# Supplementary material
Source: PubMed Central journal article supplement (PMC3871773)
Supplement: ASN.2013010089_ASN2013010089SupplementaryData.pdf [file ASN.2013010089_ASN2013010089SupplementaryData.pdf]

# SUPPLEMENT

## CONTROL GROUP ANEMIA MANAGEMENT PROTOCOL

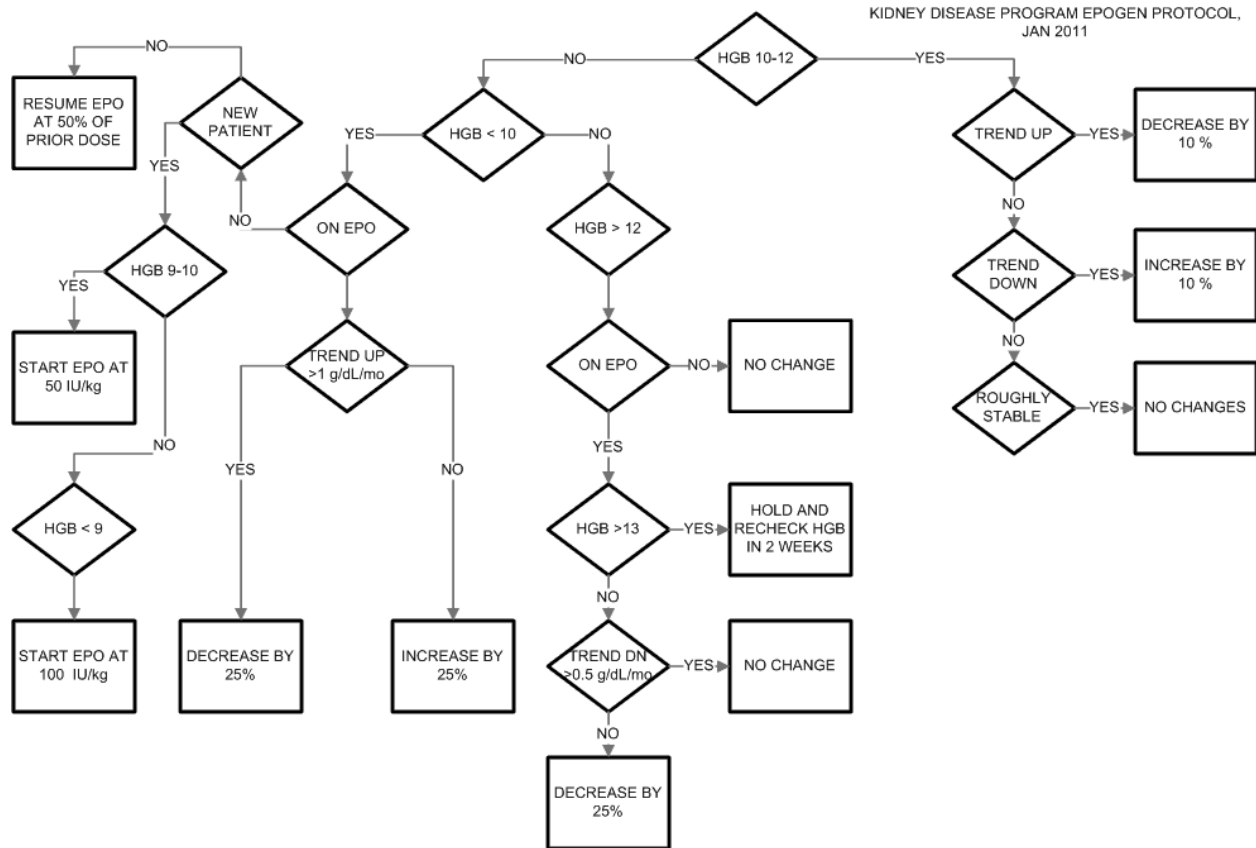

## SMART ANEMIA MANAGER\*

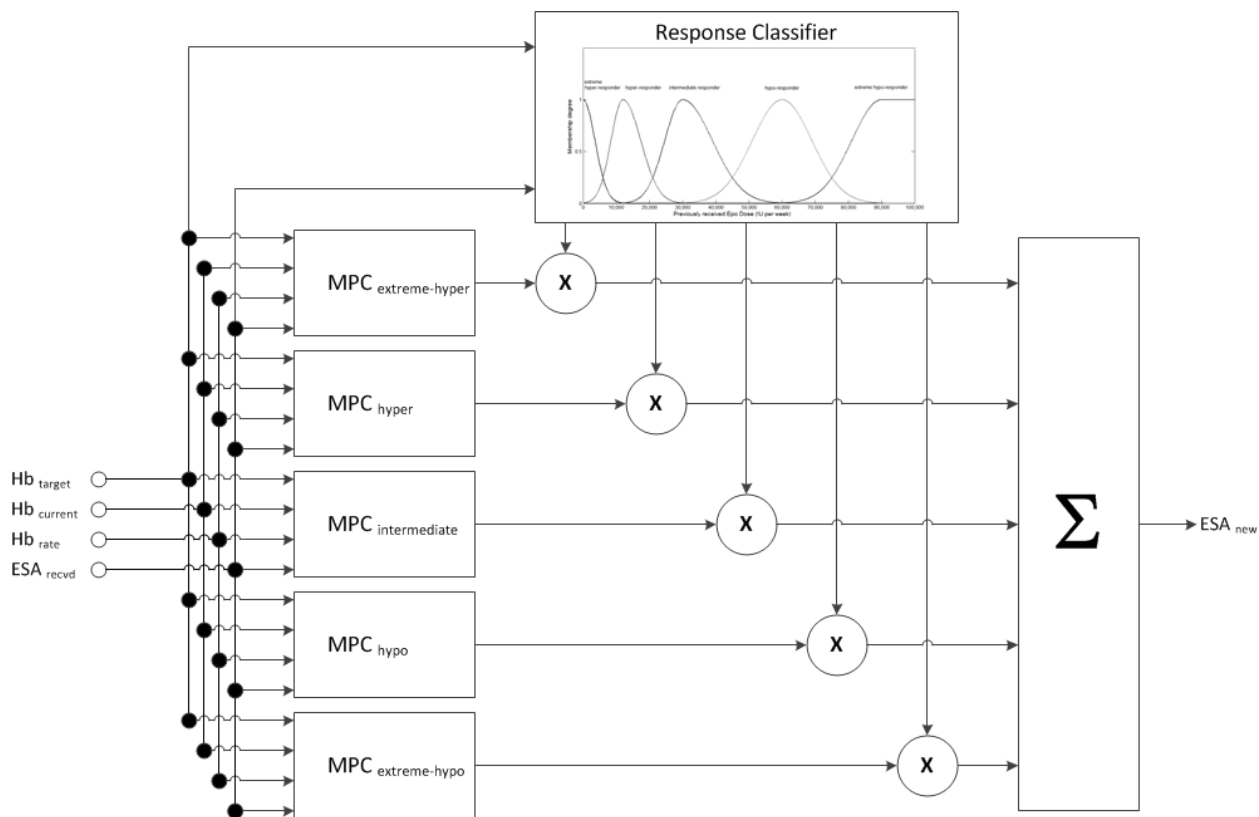

### Legend:

|                  |                                           |
|------------------|-------------------------------------------|
| MPC              | Model Predictive Controller               |
| $Hb_{target}$    | Target Hb concentration [g/dL]            |
| $Hb_{current}$   | Current Hb concentration [g/dL]           |
| $Hb_{rate}$      | Hb rate of change [g/dL/mo]               |
| $Epo_{received}$ | Average Epo dose received [1,000 IU/week] |
| $Epo_{new}$      | New recommended Epo dose [1,000 IU/week]  |

At each dosing step, Response Classifier calculates the matching degree between the patient and one of five dose-response profiles: “extreme hyper-responder”, “hyper-responder”, “intermediate responder”, “hypo-responder”, “extreme hypo-responder”. Dose-response profiles are defined based on Epo dose received to achieve target Hb.

For  $Hb_{target} = 11$  g/dL:

1. “extreme hyper-responder” requires approximately 0 to 6,000 IU/week.
2. “hyper-responder” requires approximately 6,000 to 21,000 IU/week.
3. “intermediate responder” requires approximately 21,000 to 45,000 IU/week.
4. “hypo-responder” requires approximately 45,000 to 75,000 IU/week.
5. “extreme hypo-responder” requires more than 75,000 IU/week.

An individual patient may have response characteristics that place them on the border of two types. This is why we use the idea of “approximate dose”. In SAM, it is implemented using fuzzy sets. If patient has not received any Epo, they are classified as extreme hyper-responder, i.e. initiated on a low dose.

\*Patent Pending

## STUDY DESIGN – COMPROMISE POWER ANALYSIS

Primary Outcome (% Hgb 10-12 over 12 months)

Fisher's Exact Test, Proportions, Inequality, two independent groups, one tail

Statistical significance threshold  $p = 0.05 / 12 = 0.0042$

$\beta / \alpha = 0.20 / 0.0042 = 48$

$P1 = 0.6, P2 = 0.7, P2 - P1 = 0.1$

| Total Number of Subjects | Total Sample Size | $\alpha$ | $1 - \beta$ |
|--------------------------|-------------------|----------|-------------|
| 40                       | 480               | 0.0104   | 0.50        |
| 50                       | 600               | 0.0087   | 0.58        |
| 60                       | 720               | 0.0072   | 0.64        |
| 70                       | 840               | 0.0060   | 0.70        |
| 80                       | 960               | 0.0051   | 0.75        |
| 90                       | 1080              | 0.0042   | 0.79        |
| 100                      | 1200              | 0.0035   | 0.82        |

## POST-HOC POWER ANALYSIS

Primary Outcome (% Hgb 10-12 over 12 months)

Proportions: Inequality, two independent groups (Fisher's exact test)

|                             |   |             |
|-----------------------------|---|-------------|
| Tail(s)                     | = | One         |
| Proportion p1               | = | 0.619       |
| Proportion p2               | = | 0.725       |
| $\alpha$ err prob           | = | 0.003       |
| Sample size group 1         | = | 336         |
| Sample size group 2         | = | 356         |
| Power (1- $\beta$ err prob) | = | 0.5539150   |
| Actual $\alpha$             | = | 0.002382717 |

Secondary Outcome (% Hgb < 10 over 12 months)

Proportions: Inequality, two independent groups (Fisher's exact test)

|                             |   |              |
|-----------------------------|---|--------------|
| Tail(s)                     | = | One          |
| Proportion p1               | = | 0.247        |
| Proportion p2               | = | 0.118        |
| $\alpha$ err prob           | = | 0.001        |
| Sample size group 1         | = | 336          |
| Sample size group 2         | = | 356          |
| Power (1- $\beta$ err prob) | = | 0.8975209    |
| Actual $\alpha$             | = | 0.0006749798 |

Secondary Outcome (% Hgb > 12 over 12 months)

Proportions: Inequality, two independent groups (Fisher's exact test)

|                             |   |           |
|-----------------------------|---|-----------|
| Tail(s)                     | = | One       |
| Proportion p1               | = | 0.134     |
| Proportion p2               | = | 0.157     |
| $\alpha$ err prob           | = | 0.391     |
| Sample size group 1         | = | 336       |
| Sample size group 2         | = | 356       |
| Power (1- $\beta$ err prob) | = | 0.6824050 |
| Actual $\alpha$             | = | 0.3525869 |
